# Supplementary material for: A machine learning-based approach for active monitoring of blades pitch misalignment in wind turbines
Source: Copernicus journal article supplement (doi:10.5194/wes-2024-100), 2024-09-02
Supplement: Supplementary file [file wes-2024-100-AC3-supplement.pdf]

Dear Referee #3,

First and foremost, thank you for reviewing our paper “*A machine learning-based approach for active monitoring of blades pitch misalignment in wind turbines*” (Preprint wes-2024-100).

Thank you for all of your comments.

We have carefully revised the original manuscript to accommodate all your suggestions, taking this opportunity to make minor improvements to the text. In the new version of the paper, the changes related to your suggestions are marked in purple. The point-by-point reply to your comments is reported here below.

### Major comments

*[Reviewer] The abstract could be improved by stating more clearly the methodology followed and also giving a summary of the achieved main results and model accuracies.*

[Answer] We agree with the Reviewer

[Action] We revised the abstract in the manuscript according to the Reviewer’s suggestion, to better define the methodology and include main results and model accuracy.

*[Reviewer] It should be made clear from the beginning that this is a simulation-based study, maybe by changing the wording from “experimental data” to “simulation data”.*

[Answer] The Reviewer was right. In fact, as stated from the beginning of our manuscript (as in Line 13 “The approach is validated across an extended operational envelope using data gathered **from a state-of-the-art simulation model** commonly used for designing and certifying commercial wind turbine systems”) the exploited data in the classification architecture comes from a simulation environment and no experimental data are exploited in the manuscript.

[Action] We revised all misleading lines by changing “experimental” to “simulation” data.

*[Reviewer] Since you introduce previous work and other studies on blade misalignment detection, your discussion section would benefit from putting your results in relation to prediction accuracies of other studies and modeling approaches*

[Answer] The previously cited work (Milani et al., 2024), on which the current manuscript relies, focused on a simplified scenario. Specifically, classification was performed on single misaligned blades, without considering localization issues and using a reduced range of blade misalignment (starting from 0.5 degrees) and excluding the regression approach. While we could mention the prediction accuracy and performance of the algorithm in that context, it is important to note that the simulation data and the scenario considered in the current manuscript are more complex. In this work, we have extended the analysis to include multiple blades with misalignments and larger ranges of misalignment angles (starting from 0.1 degrees). Additionally, we have addressed the localization procedure, which was not considered in the previous study. As the same applies to all other works in the literature that focus solely on pitch misalignment detection under simplified conditions, a fair comparison cannot be provided.

[Action] We do not foresee any action as we believe that the current state of the text is satisfactory.

*[Reviewer] You mention that the methodology requires a minimal set of sensors, typically available in WT systems. As I understand your methodology relies on the  $x,y,z$  blade root bending moments. Can you comment on the availability of these sensors in real wind fleets and their reliability? How would issues like sensor drift affect your methodology?*

[Answer] As the Reviewer correctly pointed out, our methodology relies on blade root bending, nodding and yawing Moments, which are essential inputs for detecting misalignment. These signals are measured by sensors commonly available in many modern wind turbines, especially in larger ones for structural monitoring purposes. Regarding their reliability, these sensors are generally robust and designed for long-term operation under harsh environmental conditions. However, sensor drift and degradation over time could pose challenges. Sensor drift, if left uncorrected, could introduce errors in the measurements and potentially affect the accuracy of the machine-learning model. To mitigate such issues, the methodology could be additionally integrated with sensor health monitoring and calibration techniques to account for drift. For instance, periodic re-calibration of the sensors could help detect and correct sensor anomalies, ensuring that the model continues to make accurate predictions despite sensor drift. Additionally, redundancy in sensor systems, where multiple sensors provide overlapping data, could enhance the robustness of the methodology against individual sensor failures or degradation. This extension is certainly interesting but falls out of the scope of the present paper.

[Action] We are actively working on improving the reproducibility of our approach, addressing the fact that moment sensors may be not available in some wind turbines. Accordingly, we recently submitted a paper focused on estimating the robustness of the presented approach when we use acceleration measurements, more often available, instead of loads, proving that similar performance is achieved in both the detection and localization of the fault. We will ensure to keep the reviewer informed should our submission be accepted. The conclusion section is also updated to point out this.

#### Minor comments

*[Reviewer] Line 25: The differentiation between machine-learning and model-based methods is a bit confusing as machine-learning models can also be used to compare expected vs. actual turbine behavior. Consider differentiating between first principle models and machine learning models.*

[Answer] We agree with the Reviewer that this differentiation may be not clear in the original version of the manuscript. We revise the text by differentiating more explicitly between first-principle models (i.e., model-based), which rely on the physical equations governing turbine behavior, and machine learning models (i.e., model-free), which learn from data to make predictions without relying on explicit physical laws.

[Action] Model-based approach has been substituted with first-principle models in the Introduction.

*[Reviewer] Line 37: Do you mean the models tend to be tailored to a specific turbine? Please clarify.*

[Answer] Yes, in a model-based approach, a physical model of the specific turbine under consideration would be required. This model is typically fine-tuned for each individual turbine and may need to be adjusted for turbines with different characteristics. Moreover, approaches based on first-principle models may be also prone to error due to the simplifications made in the development of the mathematical models.

[Action] We do not believe that the text should be changed.

*[Reviewer]Line 55: What signals would that be? Naming them would make it easier to understand the difference in your approach.*

[Answer] The signals referenced in the cited works primarily refer to force signals, such as the aerodynamic forces acting on the blades or structural forces in the turbine components which are rarely available on a real system. In contrast, our approach includes more available signals, such as blade root bending moments, which provide a more comprehensive view of the turbine structural behavior and allow for more accurate detection of anomalies related to blade misalignment in real systems.

[Action] The text has been modified according to the Reviewer's suggestion to include examples of signals used in literature-based approaches that are often difficult to obtain in real-world turbines.

*[Reviewer] Line 57: I suggest changing to third person perspective: In (Milani et al., 2024), the potential of machine-learning methods for detecting pitch misalignment was recognized. . . .*

[Answer] We agree with the Reviewer.

[Action] The text has been modified as suggested.

*[Reviewer]Line 63: Why is interpretability an issue if the method can “detect and locate misalignments, even in turbulent conditions, with satisfactory performance.”?*

[Answer] While it is true that the method can effectively detect and locate misalignments, even in turbulent conditions, accuracy cannot be the only metric to rely on for evaluating the performance of an anomaly detection approach. Indeed, interpretability remains a critical issue for several reasons. Complex machine learning models, like neural networks, can often be treated as

”black boxes”, making it difficult to understand why the model makes certain predictions. This is important because, in critical systems like wind turbines, operators should not only rely on predictions but need to also understand the reasoning behind them, especially when anomalies are detected.

Additionally, interpretability is crucial when it comes to diagnosing and troubleshooting. If the model can pinpoint an anomaly but the reasoning behind it is unclear, it could be challenging to determine the root cause and take corrective actions. For example, knowing that a misalignment is detected is useful, but understanding how the different input signals (e.g., blade root bending moments) contributed to this detection can guide more informed maintenance decisions. For this reason, to address this, our approach prioritizes interpretability by incorporating physics-based features and utilizing explainable machine learning models like linear regression and random forest.

[Action] We added a few lines to the text at the end of the paragraph ”Machine-learning approaches” to stress this fact.

*[Reviewer] Line 69: Naming the signals you use would improve clarity.*

[Answer] We agree with the Reviewer.

[Action] We have explicitly mentioned the signals exploited in our study.

*[Reviewer] Line 145: This is the first time cp-lambda is mentioned. Introduce the tool in the beginning of the paragraph.*

[Answer] The reviewer is right. The tool is already introduced at the beginning of the paragraph, (”To achieve this, we ... a high-fidelity simulation multibody tool (Bottasso and Croce, 2009–2018).”, but its name is not declared.

[Action] We added the name of the tool at the beginning of section 2.2, as suggested by the reviewer.

*[Reviewer] Paragraph 2.2: I think this paragraph lacks clarity. It should give a clear overview of the data simulation data set, including relevant input parameters and signals used for further analysis. The differentiation between “data sets” and “cases” is unclear. Also, the details on regression and classification analysis are not introduced yet and, therefore, difficult to understand.*

[Answer] We agree with the Reviewer.

[Action] We have revised the text to clarify the distinction between ’dataset’ and ’cases,’ providing more detailed explanations of our intended meanings for these terms. Moreover, the dataset used for the development of this work, i.e. all outputs of `Cp-Lambda` simulations, will be made

available through an open data-sharing platform, such as Zenodo.

*[Reviewer] Line 163: Spectral analysis?*

[Answer] We agree with the Reviewer

[Action] We have changed the text accordingly.

*[Reviewer] Figure 2+3: Clearly state what can be seen in the upper and lower plot. Where is the 0.2 Hz peak? Is the unit on the y-axis correct?*

[Answer] The reviewer is right. As indicated in the legend of the figure, we gave proof that the expected peak induced by the misalignment happens at different frequencies according to the rotor speed. However, if we perform the spectral analysis with respect to the azimuth signal, the peak remains centered around the  $1 \times \text{Rev}$ .

[Action] We modified the figures to improve clarity.

*[Reviewer] Line 235: Have you chosen a smaller window than in the initial study? Please clarify.*

[Answer] As stated in the text in Line 234-235, the window of the sliding factor has been set to one rotor revolution. The last comment "A smaller sliding factor, such as one revolution..." is a statement added to provide the reader with an intuition of the effect of varying that parameter. However, we would like to note that the sliding factor does not impact classification performance. Its sole use is to determine the frequency of prediction update.

[Action] No action is considered.

*[Reviewer] Paragraph 3/ Figure 5: It is stated that both layers rely on random forest and regression models. Please clarify what each model in the different layers does. Also, the text could be better aligned with what is shown in the figure. What is "Strategy" referring to? A more detailed explanation of the nature and functioning of the models would be beneficial. What kind of regression model is used, how is it tuned, etc?*

[Answer] At the beginning of the section in Line 238 the following statements are reported: "This Section outlines the hierarchical classification architecture we designed for detecting and isolating pitch misalignment. As described in Section 1, our classification pipeline features two layers: the first identifies misalignment, categorizing its severity as low, medium, or high using the classification model, or precisely predicting the amount using the regression one, based on

user preferences. The second layer, given that a misalignment is detected, localizes the affected blades. Both layers rely on random forest models for classification, and linear regression for the regression. These models have been chosen for their robustness, accuracy, and interoperability. Specifically, this algorithm combines the output of multiple shallow binary tree classifiers, which splits data according to specific criteria, minimizing the differences in the child nodes at each iteration.”

Indeed, we are considering an approach in which the first layer aims to identify and classify the misalignment, relying on the classification or on the regression approach depending on the available training data size and to the end application requirements; then, the second layer aims to localize the misaligned blade.

In more detail, for the classification, one between two different strategies can be followed:

- the first one relies on a Random-Forest classifier that categorizes the misalignment entity in four classes healthy or low, medium, or high misalignment.
- the second one relies on a Linear Regression classification model, that is capable of precisely predicting the specific amount of misalignment instead of producing a 4 classes classification output.

For the localization, random forest has been employed.

As for the description of the employed models and the tuning of their parameters, section 3.1.2 provides details about the two models.

[Action] The arrow between the two strategies has been removed in Figure 5 to underline that the two strategies are comparable, so one between them can be adopted.

*[Reviewer] Line 251: Restructure the sentence*

[Answer] We agree with the Reviewer.

[Action] We have restructured the sentence.

*[Reviewer] Line 253: Do you use the same classification as in the previous study in the present study? Please clarify*

[Answer] In the previous study, only the Anomaly Detection layer has been applied to the data. Specifically, we used the Random-Forest classifier strategy on a reduced set of data where misalignment was related to a single blade and with misalignment starting from  $0.5degree$ . In the current paper, we extended our dataset to include scenarios with multiple misaligned blades, demonstrating that the approach still achieves high performance. Additionally, we enhance the original framework architecture by designing a hierarchical classification structure. After the initial layer, aimed at reporting the presence of a misalignment, our novel methodology integrates an additional layer comprising a random forest classifier to localize the specifically affected blade in case misalignment is detected.

[Action] No action is considered.

*[Reviewer] 3.1.1/3.1.2 Are these two separate approaches, or are they both used simultaneously? Please clarify also concerning Figure 5.*

[Answer] Yes, indeed these are two separated approaches. The Misalignment Classification relates to the previously mentioned first strategy, where the classification is a 4 class outputs (the one employed in the previous work as well), while the Misalignment Detection, as mentioned in the text, is the expansion of the previous work, that consists of the introduction of a second and comparable strategy, namely the Linear Regression, that is also explained in Figure 5. As a matter of fact, in line 262 the following sentences are reported: "In this study, we expand upon previous research by introducing and evaluating the performance of a linear regression model. This model, trained using the same set of features employed in the misalignment classification, offers precise quantification of misalignment severity considering default hyper-parameters."

[Action] Again, the arrow between the two strategies has been removed in Figure 5 to underline that the two strategies are comparable.

*[Reviewer] Line 284: Was a hyperparameter tuning process involved, or were hyperparameters selected based on the authors' experience?*

[Answer] As mentioned in the text, hyperparameters were set to their default values unless otherwise specified. Specifically, for the Random Forest classifiers, the depth and number of estimators hyperparameters were fine-tuned based on the data, while for the linear regression model, default parameters were used.

[Action] No action is considered.

*[Reviewer] Figure 7: Are the yellow points representing the reference value? Add to legend.*

[Answer] The yellow points represent as in the previous figure, the predicted instances.

[Action] The updated legend has been added to the plot.

*[Reviewer] Figure 8: In line 296, you mention measuring the accuracy of the regression model in RMSEN, but here, absolute values are shown. Would it make sense to show RMSEN box plots?*

[Answer] Sorry for the misunderstanding, in line 296 we mention measuring the accuracy of the regression model in RMSE, not RMSEN.

[Action] No action considered.

*[Reviewer] Figure 9: Caption and text; please explain what can be seen in the subplots.*

[Answer] The description of the plots is reported in Line 320-327. Additional comments on the plots will be added in the caption.

[Action] Additional comments have been added in the caption.

*[Reviewer] Figure 10: not mentioned in the text.*

[Answer] We agree with the Reviewer.

[Action] Figure 10 has been mentioned in the text, when opportune.

We look forward to your kind reply, and in the meanwhile, we send our warmest regards.

Sincerely yours,

Sabrina Milani, on behalf of all Authors.
